# Supplementary material for: Systematic modification of the indium tin oxide work function via side-chain modulation of an amino-acid functionalization layer
Source: Royal Society of Chemistry journal article supplement (doi:10.1039/c9cp04079j), 2019-01-01
Supplement: c9cp04079j1.pdf [file c9cp04079j1.pdf]

**Supplementary information for:**

**Systematic modification of the indium tin oxide  
work function via side-chain modulation of an  
amino-acid functionalization layer**

Naomi Kramer,<sup>a</sup> Soumyajit Sarkar,<sup>b</sup> Leeor Kronik,<sup>b</sup> and Nurit Ashkenasy<sup>a\*</sup>

*<sup>a</sup>Department of Materials Engineering and Ilse Katz Institute for Nanoscale Science & Technology, Ben Gurion University of the Negev, Beer-Sheva, Israel*

*<sup>b</sup>Department of Materials and Interfaces, Weizmann Institute of Science, Rehovoth 76100, Israel*

email: nurita@bgu.ac.il

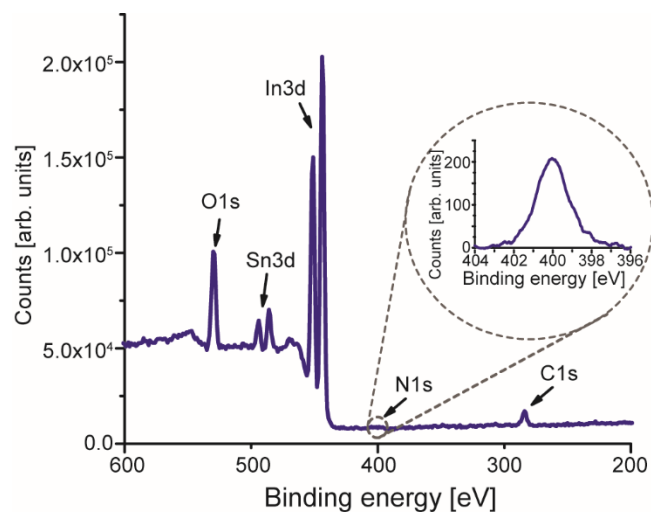

**Fig. S1.** – Representative XPS survey spectrum of ITO functionalized with tyrosine. Inset: high resolution XPS data in the range of the N1s binding energy.

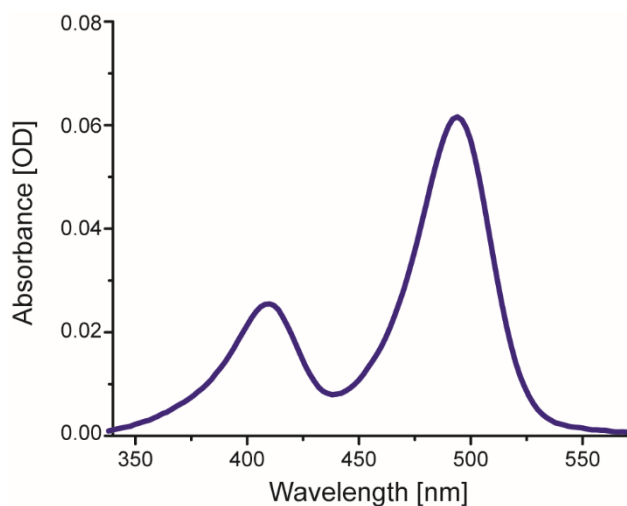

**Fig. S2.** Absorbance spectrum of 4,4'-dimethoxytrytil released from ITO surface with area of  $\sim 6 \text{ cm}^2$ , covered by a lysine monolayer treated with Sulfo-SDTB. The dye release was obtained in 35% perchloric acid solution.

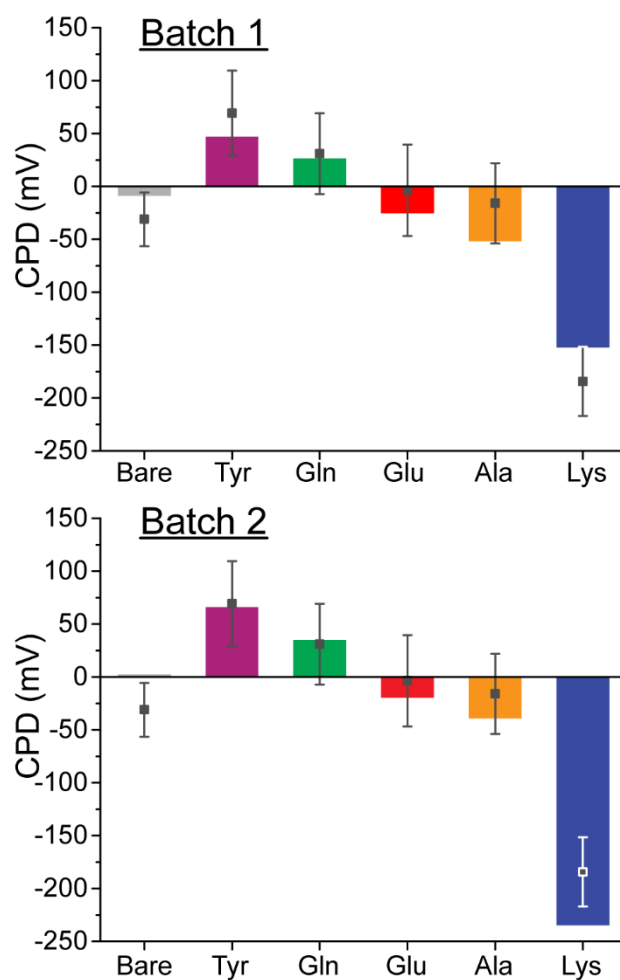

**Fig. S3.** Two Examples of CPD values of a batch of amino-acid functionalized ITO samples. All samples in each batch were prepared simultaneously from the same ITO substrate and measured on the same day. The squares represent the average data, along with the standard deviation, of all samples measured in different batches, which was used to calculate  $\Delta\phi_S$  in Figure 2a.

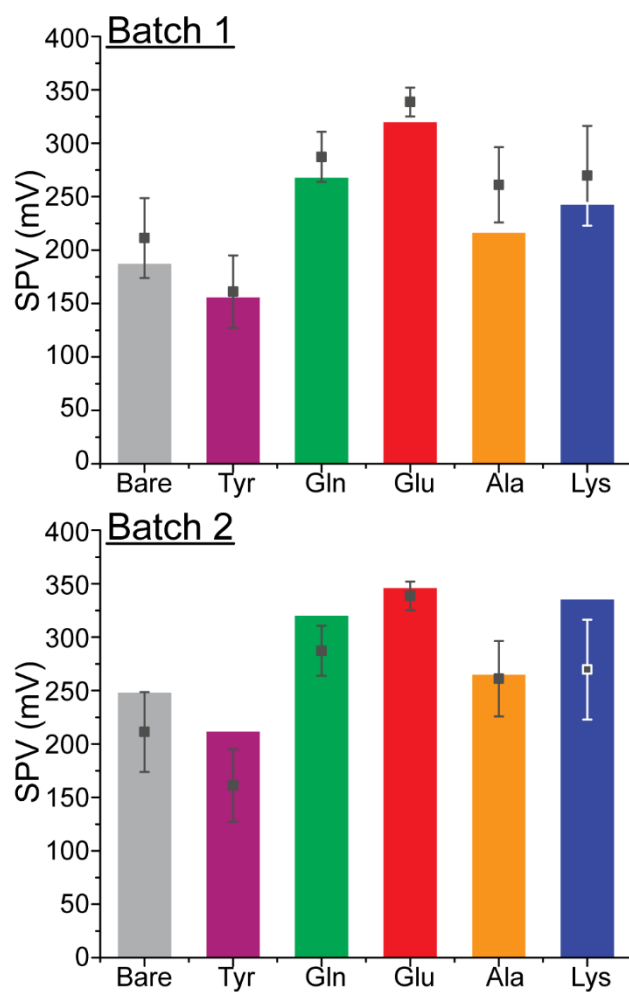

**Fig. S4.** Two Examples of SPV values of a batch of amino-acid functionalized ITO samples. All samples in each batch were prepared simultaneously from the same ITO substrate and measured on the same day. The squares represent the average data, along with the standard deviation, of all samples measured in different batches, which was used to calculate  $\Delta SPV$  for Figure 2a.
